# Supplementary material for: Formation of tin-based crystals from a SnAgCu alloy under formic acid vapor
Source: Royal Society of Chemistry journal article supplement (doi:10.1039/c8nj04173c), 2018-01-01
Supplement: c8nj04173c1.pdf [file c8nj04173c1.pdf]

## Supplementary Information

### Formation of tin-based crystals from SnAgCu alloy under formic acid vapor

Fosca Conti,<sup>\*ab</sup> Alexander Hanss,<sup>b</sup> Omid Mokhtari,<sup>b</sup> Sri Krishna Bhogaraju,<sup>b</sup> and Gordon Elger<sup>\*b</sup>

---

<sup>a</sup> Department of Chemical Sciences, University of Padova, via Marzolo 1, 35131 Padova, Italy. E-mail: fosca.conti@unipd.it

<sup>b</sup> Institute of Innovative Mobility (IIMo), Technische Hochschule Ingolstadt, Esplanade 10, 85049 Ingolstadt, Germany. E-mail: gordon.elger@thi.de

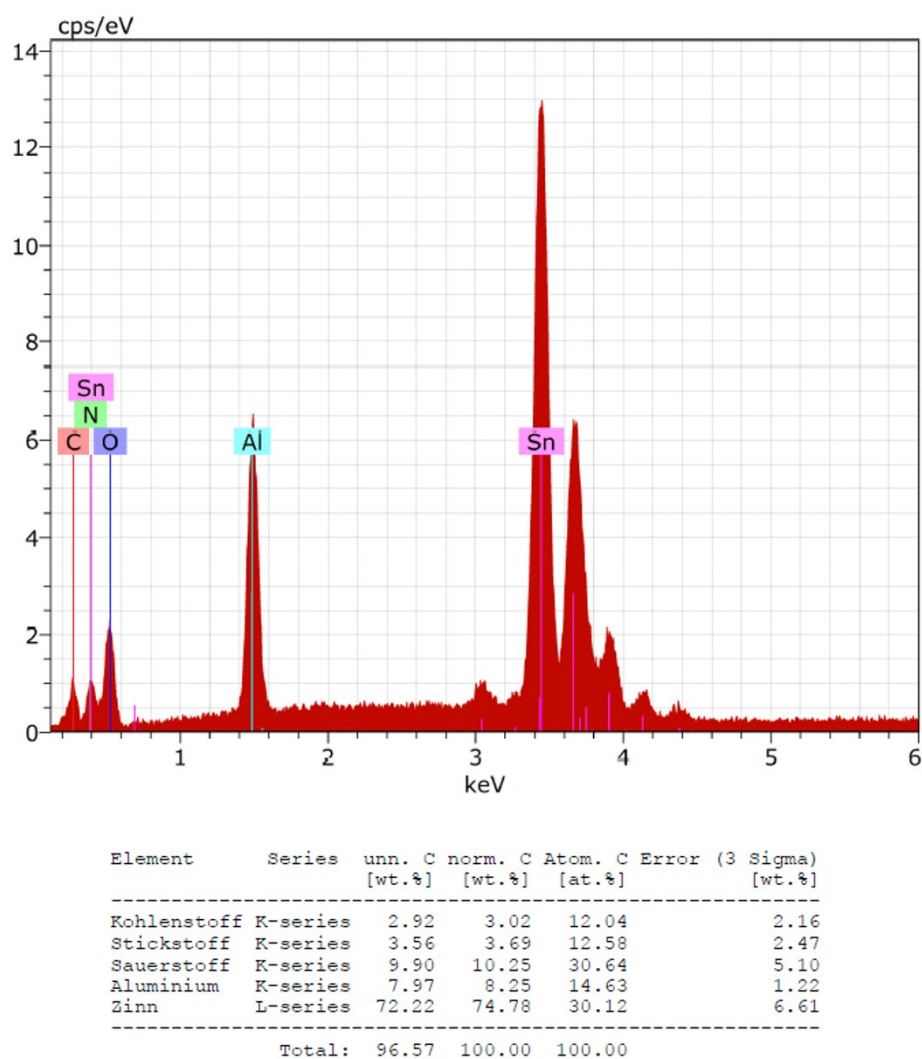

**Figure S-1.** Energy dispersive X-ray (EDX) spectrum and corresponding elemental analysis of the crystals grown on AlN substrate. Measurements were performed with a Zeiss EVO MA 15 scanning electron microscope equipped with a Bruker XFlash 6/30 detector. The authors thank Mr. Maxim Hiersing at ContiTermic Microelectronic GmbH (Ingolstadt) for the kind collaboration.

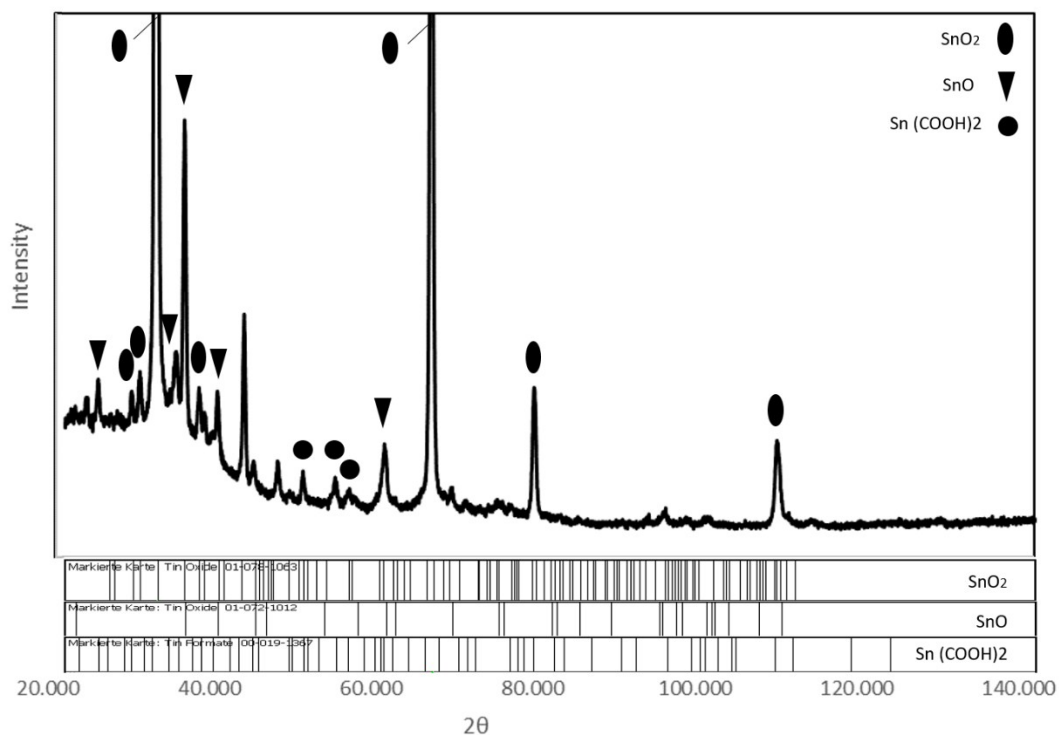

**Figure S-2.** X-ray diffraction (XRD) spectrum of the crystals grown on a glass substrate. The attribution of the lines to the  $\text{SnO}_2$ ,  $\text{SnO}$  and  $\text{Sn}(\text{COOH})_2$  faces is marked with different symbols. Measurements were performed with a diffractometer (Empyrean) using  $\text{Co-K}\alpha_1$  radiation ( $\lambda = 1.788\text{\AA}$ ) at an accelerating voltage of 40 kV. The diffracted beam was scanned in steps of  $0.03^\circ$  across a  $2\theta$  range of  $20\text{--}140^\circ$ . The authors thank Prof. Ulrich Tetzlaff of THI and his team for the kind collaboration.
